# Supplementary material for: Pharmacodynamic and Pharmacokinetic Drug Interactions between Fexuprazan, a Novel Potassium-Competitive Inhibitor, and Aspirin, in Healthy Subjects
Source: MDPI journal article supplement (doi:10.3390/pharmaceutics15020549), 2023-02-07
Supplement: s1 [file s1]

## Supplementary Materials

# Pharmacodynamic and Pharmacokinetic Drug Interactions Between Fexuprazan, a Novel Potassium-Competitive Inhibitor, and Aspirin, in Healthy Subjects

JungJin Oh <sup>1,†</sup>, Eunsol Yang <sup>1,2,†</sup>, In-Jin Jang <sup>1</sup>, Hyejung Lee <sup>3</sup>, Hokyun Yoo <sup>3</sup>, Jae-Yong Chung <sup>4</sup>, SeungHwan Lee <sup>1</sup> and Jaeseong Oh <sup>1,\*</sup>

<sup>1</sup> Department of Clinical Pharmacology and Therapeutics, Seoul National University College of Medicine and Hospital, Seoul 03080, Republic of Korea

<sup>2</sup> Medical Research Center, Seoul National University, Seoul 03080, Republic of Korea

<sup>3</sup> Daewoong Pharmaceutical Co., Ltd., Seoul 06170, Republic of Korea

<sup>4</sup> Department of Clinical Pharmacology and Therapeutics, Seoul National University Bundang Hospital, Seongnam 13620, Republic of Korea

\* Correspondence: johan25@snu.ac.kr

† These authors contributed equally to this work.

(A) Aspirin analysis group

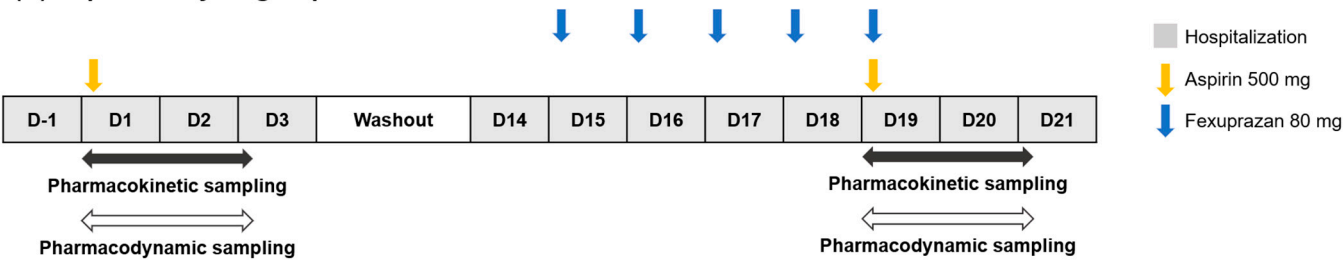

(B) Fexuprazan analysis group

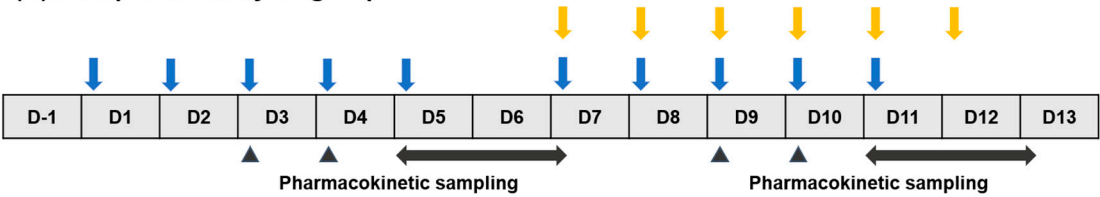

Supplementary Figure S1. Study design.

**Supplementary Table S1.** Analysis of variance (ANOVA) table for pharmacokinetic parameters of aspirin and fexuprazan.

| Parameters          | Source          | df | SS     | MS     | F     | p-value |
|---------------------|-----------------|----|--------|--------|-------|---------|
| Aspirin             |                 |    |        |        |       |         |
| AUC <sub>last</sub> | Treatment       | 1  | 0.0203 | 0.0203 | 3.38  | 0.1157  |
|                     | Group           | 4  | 0.7364 | 0.1841 | 3.56  | 0.0812  |
|                     | Treatment*Group | 4  | 0.1667 | 0.0417 | 6.95  | 0.0194  |
|                     | Subject         | 6  | 0.3107 | 0.0518 | 8.64  | 0.0095  |
|                     | Error           | 6  | 0.0360 | 0.0060 | .     | .       |
| AUC <sub>inf</sub>  | Treatment       | 1  | 0.0202 | 0.0202 | 3.28  | 0.1199  |
|                     | Group           | 4  | 0.7358 | 0.1840 | 3.59  | 0.0799  |
|                     | Treatment*Group | 4  | 0.1645 | 0.0411 | 6.69  | 0.0212  |
|                     | Subject         | 6  | 0.3078 | 0.0513 | 8.34  | 0.0104  |
|                     | Error           | 6  | 0.0369 | 0.0062 | .     | .       |
| C <sub>max</sub>    | Treatment       | 1  | 0.2974 | 0.2974 | 2.22  | 0.1668  |
|                     | Group           | 4  | 1.9142 | 0.4786 | 2.15  | 0.1917  |
|                     | Subject         | 6  | 1.3339 | 0.2223 | 1.66  | 0.2276  |
|                     | Error           | 10 | 1.3372 | 0.1337 | .     | .       |
| Fexuprazan          |                 |    |        |        |       |         |
| AUC <sub>τ,ss</sub> | Treatment       | 1  | 0.2801 | 0.2801 | 44.31 | <0.001  |
|                     | Group           | 5  | 2.5811 | 0.5162 | 1.27  | 0.4012  |
|                     | Subject         | 5  | 2.0394 | 0.4079 | 64.53 | <0.001  |
|                     | Error           | 10 | 0.0632 | 0.0063 | .     | .       |
| C <sub>max,ss</sub> | Treatment       | 1  | 0.0704 | 0.0704 | 5.09  | 0.0477  |
|                     | Group           | 5  | 2.5896 | 0.5179 | 1.34  | 0.378   |
|                     | Subject         | 5  | 1.9325 | 0.3865 | 27.96 | <.0001  |
|                     | Error           | 10 | 0.1382 | 0.0138 | .     | .       |

If the fixed effect of the interaction between treatment and group was not statistically significant, analysis of variance was performed excluding the corresponding effect.

Abbreviations: df, degree of freedom; SS, sum of squares; MS, mean square; F, F-test statistic.

**Supplementary Table S2.** Pharmacokinetic parameters of salicylic acid, an active metabolite of aspirin, determined after a single oral administration of aspirin 500 mg alone and coadministered with fexuprazan 80 mg.

| Parameters                   | Aspirin 500 mg + Fexuprazan 80 mg<br>(N=11) | Aspirin 500 mg only<br>(N=11) |
|------------------------------|---------------------------------------------|-------------------------------|
| AUC <sub>last</sub> (h·mg/L) | 209.89 ± 121.86                             | 207.98 ± 142.16               |
| AUC <sub>inf</sub> (h·mg/L)  | 214.58 ± 122.31                             | 214.25 ± 142.05               |
| C <sub>max</sub> (mg/L)      | 29.79 ± 6.49                                | 27.73 ± 6.23                  |
| Metabolic ratio <sup>a</sup> | 40.93 ± 13.18                               | 42.52 ± 16.61                 |

All data are presented as mean ± standard deviation.

Abbreviations: AUC<sub>last</sub>, area under the concentration-time curve (AUC) from time 0 to the time of the last quantifiable concentration; AUC<sub>inf</sub>, AUC from 0 to infinity; C<sub>max</sub>, maximum plasma concentration.

<sup>a</sup> Ratio of AUC<sub>inf</sub> of salicylic acid to AUC<sub>inf</sub> of aspirin

**Supplementary Table S3.** Pharmacokinetic parameters of M14, a metabolite of fexuprazan, determined after multiple oral administrations of fexuprazan 80 mg alone and coadministered with aspirin 500 mg.

| Parameters                   | Fexuprazan 80 mg + Aspirin 500 mg<br>(N=11) | Fexuprazan 80 mg only<br>(N=11) |
|------------------------------|---------------------------------------------|---------------------------------|
| AUC <sub>τ,ss</sub> (h·μg/L) | 3095.05 ± 749.42                            | 3089.57 ± 690.99                |
| C <sub>max,ss</sub> (μg/L)   | 300.55 ± 107.88                             | 282.00 ± 96.01                  |
| Metabolic ratio <sup>a</sup> | 4.17 ± 2.68                                 | 3.16 ± 1.73                     |

All data are presented as mean ± standard deviation.

Abbreviations: AUC<sub>τ,ss</sub>, area under the concentration-time curve for a dosing interval at steady state; C<sub>max,ss</sub>, maximum plasma concentration at steady state.

<sup>a</sup> Ratio of AUC of M14 to AUC<sub>τ,ss</sub> of fexuprazan
